# Supplementary material for: Training Healthcare Professionals on How to Promote Physical Activity in the UK: A Scoping Review of Current Trends and Future Opportunities
Source: MDPI journal article supplement (doi:10.3390/ijerph18136701), 2021-06-22
Supplement: s1 [file s1]

## Supplementary File 2: Search Terms and Database Strategy

Table S1: Search terms used in database search

| Population                 | Concept            | Context                             |
|----------------------------|--------------------|-------------------------------------|
| Healthcare Professional*   | Physical activity  | education                           |
| Health Professional*       | Physical fitness   | e-learning                          |
| Healthcare worker*         | Health promotion   | eLearning                           |
| Clinician                  | Physical Exercise* | curricula                           |
| Consultant                 |                    | curriculum                          |
| Doctor                     |                    | undergraduate                       |
| General practitioner       |                    | postgraduate                        |
| physician                  |                    | Continuous professional development |
| Medical professional*      |                    | CPD                                 |
| Medical student*           |                    | training                            |
| Nurses/Nursing/nurse       |                    |                                     |
| Occupational Therap*       |                    |                                     |
| Physiotherap*              |                    |                                     |
| Allied Health Professional |                    |                                     |
| Social Work*               |                    |                                     |

Table S2: Example search strategy (MEDLINE)

| # | Searches                                                                                                                                                                                                                                                                                                                                                                                                                                                                                                                                                                         |
|---|----------------------------------------------------------------------------------------------------------------------------------------------------------------------------------------------------------------------------------------------------------------------------------------------------------------------------------------------------------------------------------------------------------------------------------------------------------------------------------------------------------------------------------------------------------------------------------|
| 1 | ((Health Worker or Health\$ Worker or Health Professional or Healthcare Professional or Medic\$ student or Medic\$ undergraduate or Medic\$ postgraduate or Nurse or Nursing or Nurses or Occupational Therapist or Physiotherap\$ or Allied Health Professional\$ or social work or Doctor or Physician or Clinician or Consultant) and ((Physical adj (Activity or Fitness or Exercise)) or Health Promotion) and ((university or undergraduate or postgraduate or professional development or CPD) and (education or training or curricul\$ or elearning or e-learning))).ab. |
| 2 | limit 1 to english language                                                                                                                                                                                                                                                                                                                                                                                                                                                                                                                                                      |
| 3 | ((Health Worker or Health\$ Worker or Health Professional or Healthcare Professional or Medic\$ student or Medic\$ undergraduate or Medic\$ postgraduate or Nurse or Nursing or Nurses or Occupational Therapist or Physiotherap\$ or Allied Health Professional\$ or social work or Doctor or Physician or Clinician or Consultant) and ((Physical adj (Activity or Fitness or Exercise)) or Health Promotion) and ((university or                                                                                                                                              |

|   |                                                                                                                                                                                                                                                                                                                                                                                                                                                                                                                                                                                    |
|---|------------------------------------------------------------------------------------------------------------------------------------------------------------------------------------------------------------------------------------------------------------------------------------------------------------------------------------------------------------------------------------------------------------------------------------------------------------------------------------------------------------------------------------------------------------------------------------|
|   | undergraduate or postgraduate or professional development or CPD) and (education or training or curriculum\$ or elearning or e-learning))).ti.                                                                                                                                                                                                                                                                                                                                                                                                                                     |
| 4 | limit 3 to english language                                                                                                                                                                                                                                                                                                                                                                                                                                                                                                                                                        |
| 5 | ((Health Worker or Health\$ Worker or Health Professional or Healthcare Professional or Medic\$ student or Medic\$ undergraduate or Medic\$ postgraduate or Nurse or Nursing or Nurses or Occupational Therapist or Physiotherap\$ or Allied Health Professional\$ or social work or Doctor or Physician or Clinician or Consultant) and ((Physical adj (Activity or Fitness or Exercise)) or Health Promotion) and ((university or undergraduate or postgraduate or professional development or CPD) and (education or training or curriculum\$ or elearning or e-learning))).kf. |
| 6 | limit 5 to english language                                                                                                                                                                                                                                                                                                                                                                                                                                                                                                                                                        |
