# Supplementary material for: Training Healthcare Professionals on How to Promote Physical Activity in the UK: A Scoping Review of Current Trends and Future Opportunities
Source: Int J Environ Res Public Health. 2021 Jun 22;18(13):6701. doi: 10.3390/ijerph18136701 (PMC8297298; doi:10.3390/ijerph18136701)
Supplement: Supplementary file 1 [file ijerph-18-06701-s001.zip › Supplementary File 3.xlsx]

## Sheet: Sheet1
Citation	Title	Author	Year	Study location	Empirical or non-empirical	Study Design	Study description	Participant information	HCP (Population)	Context of Study	Concept	Key findings
				in which country did the study take place?			describe study in few sentences/Objectives	N, age, gender, ethnicity, activity level, HCP	What type of HCP took part in the study (inc. Institutions)?	did the studies primary focus relate to CPD, E-learning, Undergraduate Education? If so, how was this information presented to HCPs?	Did the paper focus on PA or provide holistic health promotion? Expand	list the key findings in a few sentences
Osborne SA, Adams JM, Fawkner S, et al. Tomorrow's doctors want more teaching and training on physical activity for health. British Journal of Sports Medicine 2017;51:624-625.	Tomorrow's doctors want more teaching and training on physical activity for health	Osborne, S.A., Adams, J.m., Fawkner, S., Kelly, P., Murray, A.D., & Oliver, C.W.	2016	United Kingdom	Non Empirical	Editorial	Steps taken to improve the curriculum in UoE Medical School	n= 395 medical studens Questionnaire to assess knowledge of PA guidelines 14.9% and 24.3% knew child and adult PA guidelines 90% reported desire for formal training	Medical students	Undergraduate: Online resources	Year 1: PA for Health content into Health, Ethics and Society Module Lecture in Welcome Week (week 1) on PAFH Year 2: Lecture on PAFH Epidemiology Year 2, 4 and 5: Individual or group projects on PAFH Essay prize on PAFH led by SEM Society	Looking to incorportate assessment and additional framework for student-led initiatives
Brannan M, Bernardotto M, Clarke N, et al. Moving healthcare professionals – a whole system approach to embed physical activity in clinical practice. BMC Medical Education 2019;19:84. doi: 10.1186/s12909-019-1517-y	Moving healthcare professionals – a whole system approach to embed physical activity in clinical practice	Brannan, M., Bernardotto, M., Clarke, N., & Varney, J.	2019	United Kingdom	Non Empirical	Technical Advance	Evaluation of MHPP implementation into UK medical schools	Medical undergraduate students Medical Postgraduate Students CPD of HCPs Clinical Champions	Medical Students Medical Practioners	Undergraduate: Curriculum Postgradiuate: Curriculum CPD: E-Learning Module CPD: Face to Face Training	Exercise Works slides integrated into curriculum FSEM embedded material within Medical Royal College curriculum BMJ E-Learning Series Clinical Champions	26 Medical schools have agreed to implement PA modules into curriculum 9 BMJ Modules cover >4.5hrs worth of CPD training 17105 HCPs received peer face to face training
Weiler R, Chew S, Coombs N, et al. Physical activity education in the undergraduate curricula of all UK medical schools. Are tomorrow's doctors equipped to follow clinical guidelines?. British Journal of Sports Medicine 2012;46:1024-1026.	Physical activity education in the undergraduate curricula of all UK medical schools. Are tomorrow’s doctors equipped to follow clinical guidelines?	Weiler, R., Chew, S., Coombs, N., Hamer, M., & Stamatakis, E.	2012	United Kingdom	Empirical	Exploratory	Questionaire sent out to 31 medical schools to assess medical school implementation of PA promotion	31 UK medical schools	Medical Schools	Undergraduate: Curriculum	Teaching 'integrated' into curriculum Embedded in current modules including public health (8), cardiology (7), respiratory or endocrine (7), health promotion (2), and community and general practice (2) Difficult to quantify or assess the teaching within curriculum	PA taught average year 2.3 PA teaching average 4.2hrs withing whole curriculum 15/31 Medical Schools taught current CMO guidelines
Jones PR, Brooks JHM, Wylie A. Realising the potential for an Olympic legacy; teaching medical students about sport and exercise medicine and exercise prescribing. British Journal of Sports Medicine 2013;47:1090-1094.	Realising the potential for an Olympic legacy; teaching medical students about sport and exercise medicine and exercise prescribing	Jones, P.R., Brooks, J.H.M., & Wylie, A.	2013	United Kingdom	Empirical	Exploratory	Implementation of PA BCT training into medical curriculum of King's College London School of Medicine	Kings College London School of Medicine	Medical Schools n=121 1st and 2nd Year Mediucal students	Undergraduate Curriculum	Four lectures spread across three years of curriculum. 1st Year: 1. The benefits of physical activity for health 2.Physiological adaptations associated with regular exercise and the accompanying risks. 2nd Year: 3. The doctor's role in assessing and prescribing physical activity. 3rd Year: 4. Prescribing physical activity and exercise	BCT on exercise medicine is an acceptable and successful method. Medical student's attitudes towards PA promotion significantly increased following teaching.
Gates AB. Making every contact count for physical activity—for tomorrow's patients: the launch of the interdisciplinary, undergraduate, resources on exercise medicine and health in the UK. British Journal of Sports Medicine 2016;50:322-323.	Making every contact count for physical activity—for tomorrow’s patients: the launch of the interdisciplinary, undergraduate, resources on exercise medicine and health in the UK	Gates, A.B	2016	United Kingdom	Non Empirical	Editorial	Launch of PA promotion resources for all health professional students	HCP students	HCP students	Undergraduate: Curriculum	Teaching resources for all undergraduate HCPstudents Now includes: pregnancy, osteoarthritis/rheumatoid arthritis, osteoporosis/sarcopenia, falls prevention and motivational interviewing	September 2015 launch of: an interdisciplinary, undergraduate, curricula and resources 29 expert reviewers have rated these resources 8/10 Exercise medicine and health MCQs in development for resource bank
Gates AB, Swainson MG, Isba R, et al. Movement for Movement: a practical insight into embedding physical activity into the undergraduate medical curriculum exemplified by Lancaster Medical School. British Journal of Sports Medicine 2019;53:609-610.	Movement for Movement: a practical insight into embedding physical activity into the undergraduate medical curriculum exemplified by Lancaster Medical School	Gates, A.B., Swainson, M.G., Isba, R., Wheatley, R.G., & Curtis, F.A.	2019	United Kingdom	Non Empirical	Commentary	Embedding of 'Movement for Movement' into curriculum at Lancaster Medical School Generic resources in Year 1 and specific resources in Years 2/3 to enhance learning on NCD's.	Medical students	Medical students	Undergraduate: Curriculum	Embedding PA promotion into current medical curriculum Generic resources supplied in Year One Specific resources in Year Two/Three on learning on NCD Problem-based learning scenario focused on major NCD or age-related condition.	12/16 medical schools in the UK now provide access to teaching and resources on PA. This has a reach of 120,000 students.
Pandya T, Marino K. Embedding sports and exercise medicine into the medical curriculum; a call for inclusion. BCM Medical Education 2018;18:306. doi:10.1186/s12909-018-1422-9	Embedding sports and exercise medicine into the medical curriculum; a call for inclusion	Pandya, T., & Marino, K.	2018	United Kingdom	Non Empirical	Review	Call to embed SEM into student medical curricula	Medical students	Medical students	Undergraduate: Curriculum	Implementation of SEM modules in medical curricula Assisted by PHE and Sport Engalnd with 'Movement for Movement' SEM optional module rather than compulsory	52% of sample of final-year medical students comfortable delivering PA advice Issue with implementing SEM is lack of space within current medical curricula SEM Societies established in n=26 Medical Schools
Lowe A, Gates A, Callaghan P. Special interest report: making every contact count for physical activity: equipping tomorrow’s physiotherapists to deliver high quality physical activity interventions. Physiotherapy 2016:102e45-46	Special interest report: making every contact count for physical activity: equipping tomorrow's physiotherapists to deliver high quality physical activity interventions	Lowe, A., Gates, A. & Callaghan, P.	2016	United Kingdom	Non Empirical	Special Interest Report	Create high quality PA interventions for HEI phjysiotherapy students	n=300 Physiotherapisty students	Physiotherapy	Undergraduate Curriculum Undergraduate: Online Resources	Implementation of 'Exercise works', 30 presentations covering PA and long term health conditions. Webfolio houses the resources	Now over 400 secure resource downloads from schools of health and medicine. In Sep 2015, these resources have been made available to undergraduate nursing, midwifery and allied health professions courses internationally
Waterall J. New tools to help boost your prevention impact. Practice Nursing 2019;30:244-245. doi: 10.12968/pnur.2019.30.5.244	New tools to help boost your prevention impact	Waterall, J.	2019	United Kingdom	Non Empirical	Commentary	Application of free e-learning within primary healthcare vie PHE All Our Health framework. Guidance on over 26 topics	Nursing	Healthcare Professionals	CPD: E-Learning Module	All our Health E-learning within 26 public health topics. See [23] PA training includes 1. Importance of PA. 2. The Health benefits of PA. 3. Detailed Guidelines on PA	E-learning available to all HCP's See NHS E-LH
Gates AB. Training tomorrow's doctors, in exercise medicine, for tomorrow's patients. British Journal of Sports Medicine 2015;49:207-208.	Training tomorrow's doctors, in exercise medicine, for tomorrow's patients	Gates, A.B.	2015	United Kingdom	Non Empirical	Editorial	Mapping of international and national exercise medicine recommendations and guidance against requirements for 'Tomorrows Doctors'. Conntent analysis of Nottingham University Medical School core exercise medicine and chronic disease module	Medical students	Medical students	Undergraduate: Curriculum	Exercise medicine and chronic disease module 10hr, referenced slide set consisting of: Introduction to physical activity and health Physiological adaptations to exercise Prescribing physical activity and exercise Public health and exercise Cancer and exercise Heart disease, stroke and peripheral artery disease and exercise Hypertension and exercise Type 2 diabetes and exercise Mental health, seve…	Available to all universities, these resources are available via the Medical Schools Council. PA advice included in at least 76 NICE guidelines. Exercise medicine can be mapped against five of the six core duties for a doctor.
Gates AB, Ritchie IK, Moffatt F, et al. Leadership in physical activity: is this the currency of change in the student healthcare curriculum?. British Journal of Sports Medicine 2018;52:1484-1485.	Leadership in physical activity: is this the currency of change in the student healthcare curriculum?	Gates, A.B., Ritchie, I.K., Moffatt, F., & Breda, J.	2018	United Kingdom	Non Empirical	Editorial	Framework for implementation of Movement for Movement and profiled 15 examples of best practice	16 Medical schools; 83 Schools of Health	Medical Schools	Undergraduate: Curriculum	Four medical schools applied CMO Infographic + WHO Guideloines. Four universities incorporated MECC into NCD prevention. Cambridge developing short PHE-endorsed podcast. Oxford Medical School piloting year-5 Public Health module including BCT in PA.	PA delivers on 13 of the 17 Sustainable Development Goals. See Supp. Files 1 and 2 for details of Movement for Movement embedded in curricula.
Milton K, Larner J, Hanson, et al. Embedding physical activity into the healthcare curriculum – a case study. Education for Primary Care 2020;3:176-179	Embedding Physical Activity into the Healthcare Curriculum – A Case Study	Milton, K., Larner, J., Hanson, S., & Jones, A.	2020	United Kingdom	Empirical	Case Study	Case study review of the structure and content of current pre-registration health-related courses to identify opportunities to deliver more content on PA at UEA.	Faculty of Medicine and Health Sciences at UEA	Medical and health students + faculty members	Undergraduate Curriculum Undergraduate: E-Learning	First-year students receive two lectures, one on links between PA and health. The second discusses the role of the medical profession in assessing and counseling PA (using Moving medicine resources). Health courses now include assessment of PA when taking patient histories, and to use PA as therapeutic intervention. Students have access to e-learning platform with content inc. CMO guidelines and …	Patient PA level incorporated into problem-based learning. PA behaviour change addresses in enquiry-based learning by physiotherapists and OT's.
Gates AB, Ritchie IK. Embedding physical activity in the undergraduate curriculum. Public Health England. 2018. https://rcc-uk.org/wp-content/uploads/2018/06/Embedding-Physical-Activity.pdf [Accessed 23 Dec 2020].	Embedding physical activity in the undergraduate curriculum	Gates, A., & Ritchie, I.	2018	United Kingdom	Non Empirical	Review	Development of clear framework of embedding PA into medical curriculum across UK Medical Schools	16 Medical Schools 64 Higher Education Institutions	Medical Schools Schools of Health	Undergraduate: Curriculum	1. Context for PA/MECC in curricula 2. Exercise & surgery 3. workshop participation 4. round table discussion 5. interdisciplinary approach 6. commitment to curricula change 7. use of #M4M resources 8. use of own PA material 9. CMO guidance 10. Motivate2Move resources for GPs 11. Assessment of clinical PA skills 12. exams on PA 13. PA taught in pre-clinical years	Royal College of Chiropracters asked for support and access to resources concern that curricula is currently full with little room for additional material Assessment of the standard of teaching materials is developed by the General Medical Council, the CoDH and PHE to achieve consistency and sustainability in student learning activities and skills, particularly in relation to the CMO infographics…
Gates AB, Ritchie IK. Appendices: Embedding physical activity in the undergraduate curriculum. Public Health England. 2018. https://rcc-uk.org/wp-content/uploads/2018/06/Embedding-Physical-Activity_Appendices.pdf [Accessed 23 Dec 2020].	Appendices: Embedding physical activity in the undergraduate curriculum	Gates, A., & Ritchie, I.	2018	United Kingdom	Non Empirical	Review	Development of clear framework of embedding PA into medical curriculum across UK Medical Schools	16 Medical Schools 64 Higher Education Institutions	Medical Schools Schools of Health	Undergraduate: Curriculum	University of Leicester: Year 1 of Health Enhancement Programme Exercise and CMO Guidelines Benefits of exercise Exercise and NCDs PA and Academic Performance Exercise on Prescription inc. content of ref "Embedding physical activity in the undergraduate curriculum "	Consultations with UK Medical Schools and Health Colleges. Range of feedback and ideas to implement #M4M resources into curriculum
Copeland RJ, Myers A, Quirk H. Evaluation of the Public Health England and Sport England Funded Sport and Exercise Medicine Pilot in Secondary Care. 2020. doi: 10.31219/osf.io/qtnjx	Evaluation of the Public Health England and Sport England funded sport and exercise medicine pilot in secondary care	Copeland, R., Myers, A., Quirk, H., Crank, H., Broom, D., & Goldsmith, S.	2019	United Kingdom	Empirical	Mixed Methods	Implementation of SEM Pilot applying COM-B Model to assess patient PA in NHS 'Active Hospital'	249 HCP over 18 training sessions	NHS Trust Hospitals	CPD: Intervention CPD: Online Resources	PA Calculator integrated into healthcare pathways Staff trained on MI techniques f2f 8 week MI course Films and Posters displayed in waiting area iCAN tool to assess patient PA capability	Increase in maternity PA levels post-MI for women with GDM iCAN tool being used but only when PA Champion was on the ward
Carlin E, Musson H, Adams EJ. Evaluation of the clinical champion’ physical activity training programme (moving healthcare professionals phase 1). National Centre for Sport and exercise Medicine, Loughborough University. 2019. OSF Preprints	Moving Healthcare Professionals Programme Phase 1: Clinical Champions Physical Activity Training Programme	Carlin, L., Musson, H., & Adams, E.J.	2019	United Kingdom	Empirical	Mixed Methods	Summary, evaluation, key findings and recommendations of Phase 1 of MHPP Clinical Champions Programme	8917 HCPs 46 Clinical Champions	22% Doctors in Training 21% Nurses 25% Other HCPs	CPD: Protected Learning Time (41%) CPD: Other CPD Event (32%) CPD: Protected Training Initiative (13%) CPD: GP Vocational Training Scheme (9%) CPD: Conferences (5%)	Avg. duration 88 minutes Core Slide set (65%) Core + Supplementary Slides (32%) PA Clinical Advice Pad (22%) Motivational Interviewing (17%) Not Specified (36%) Psychology (13%) Pharmacy, Psychiarty, Mental Health, Psychology and MH (<2%)	n=509 total CC training sessions delivered avg. 17 HCPs trained per session HCP confidence to advise patients significantly increased between baseline and 4/12wk follow-up HCP increased patient advise of benefits of PA between baseline and 4wk, but dropped at 12wk (still > baseline) Moving Medicine resource suggested as good follow-up resource
Copeland RJ, Myers A, Quirk H. Evaluation of the Public Health England and Sport England Funded Physical Activity Clinical Advice Pad Pilot in Primary Care. 2020. doi:10.31219/osf.io/st94m	Evaluation of the Public Health England and Sport England funded physical activity clinical advice pad pilot	Copeland, R., Myers, A., Quirk, H., Crank, H., Broom, D., & Goldsmith, S.	2019	United Kingdom	Empirical	Mixed Methods	Imprementation of PACAP to (a) assess capability of PACAP for HCP and patients (b) understand barriers and benefits of PACAP (c) explore use of PACAP by different HCPs (d) understand most effective way to implement in primary care	433 HCPs	Nurses Doctors Doctores in Training Other HCPs	CPD: F2F CC + PACAP Slides CPD: F2F (William Bird) + PACAP Slides CPD: F2F PACAP Slides CPD: Online PACAP Webinar	No intervention protocol that set out how PACAP was to be used - 'bolt on' to CC slides Brief advice about PA Assessing patient PA level How to record and use of PACAP How to use in routine clinical practice	Barrier: not remembering to use it Not seeing value in it Not being suitable for patient Not having PACAP to use
Pugh G, O'Halloran P, Blakey L, et al. Integrating physical activity promotion into UK medical school curricula: testing the feasibility of an educational tool developed by the Faculty of Sports and Exercise Medicine. BMJ Open Sport & Exercise Medicine 2020;6:e000679. doi: 10.1136/bmjsem-2019-000679	Integrating physical activity promotion into UK Medical School curricula: testing the feasibility of an educational tool developed by the faculty of Sports and Exercise Medicine	Pugh, G., O'Halloran, P., Blakey, L., Leaver, H., & Angioi, M.	2020	United Kingdom	Empirical	pre-post	UK medical students assessed for belief-in, knowledge, confidence and ability to prescribe PA in clinical setting post FSEM booklet intervention	n=205 Medical Students (n=15 postgraduate medicine) Across 16 Medical Schools	Medical students	Undergraduate: Additional Resource	1. Exercise History 2. Motivational Strateges 3. Who can safely start exercising? 4. Exercise Prescription 5. Exercise and NCDs	FSEM booklet has the potential to improve medical students knowledge and confidence to prescribe PA without added curricula burden
Gates A. How to use the “Movement for Movement” resources. Movement for Movement. 2017. https://councilofdeans.org.uk/wp-content/uploads/2017/11/2017-VERSION-HOW-TO-USE-THE-MOVEMENT-FOR-MOVEMENT-RESOURCES-GUIDE.pdf [Accessed 24 Dec 2020]	How to use the "Movement for Movement" resources	Gates, A,.	2017	United Kingdom	Non Empirical	Summary	How-to resource to implement Moveent for Movement resources into undergraduate education. Endorsed by CoDoH, the resource acts as a stand alone, spiral curriculum whereby schools of medicne and health can tailolr to their own needs.	Medical Schools Schools of Health	Medical Schools Schools of Health	Undergraduate Curriculum	Introduction to PA and Health Physiological adaptations to exercise and associated RF Prescribing PA and Exercise PH and Exercise Cancer and Exercise CVD and Exercise Hypertension and Exercise T2 Diabetes and Exercise Mental health and Exercise Dementia and Exercise Osteoarthritus and Exercise Osteoporosis and Exercise Falls and Exercise Obesity and Exercise COPD and Exercise Pregancy and Exercis…	Each medical school to devise suitable learning techniques, including; facilitated learning, reflective learning, peer-led discussion forums, quizzes, examinations, practival experience of PA interventions, dissertation, and placement opportunities
Gates A. How to use the ‘Movement for Movement’ resources Erasmus+ 2020-2025 update. Movement for Movement. 2020. https://councilofdeans.org.uk/wp-content/uploads/2020/11/ERASMUS-How-to-use-the-resources-in-medical-and-health-education-1.pdf [Accessed 24 Dec 2020]	How to use the "Movement for Movement" resources Erasmus+ 2020-2025 update	Gates, A,.	2020	United Kingdom	Non Empirical	Summary	Exercise medicine resource updated for the Erasmum+ VANGUARD partnership. MfM aims to build stronger strategic and operational capacity in delivering PA interventions and system change agenecy by healtchcare workforce. Current project sees implementation of resources in Lithuania, Estonia, Greece, Portugal, and France	Medical Schools Schools of Health	Medical Schools Schools of Health	Undergraduate Curriculum	Leadership on PA in health and wellbeing WHO and UK PA guidelines and recommendations MECC Brief interventions and making every influence matter Cancer and exercise CVD, exercise and cardiac rehabilitation T2 Diabetes and exercise Mental health and exercise Osteoporosis, sarcopenia and exercise Fall and exercise COPD, exercise and pulmonary rehabilitation Surgery and exercise hypertension and exe…	Three elements combine to form community of practice; 1. Domain, 2. Community, and 3. Practice
E-learning for Healthcare. Physical Activity and Health. E-learning for Healthcare, United Kingdom. https://www.e-lfh.org.uk/programmes/physical-activity-and-health/ [Accessed 10 Dec 2020].	E-Learning for Healthcare: Physical Activity and Health	Public Health England Sport England	2019	United Kingdom	Non Empirical	E-Learning	E-Learning programme for Healthcare to champion PA with patients	GPs Nurses Other HCPs	GPs Nurses Other HCPs	CPD: E-Learning Module	Importance of PA Health Benefits of PA Guidelines and Infographics Promoting PA in Primary Care Children and Young People: Being Active Older Adults: Being Active CVD: Being Active T2 Diabetes: Being Active Cancer: Being Active Mental Health: Being Active MSK Health: Being Active Pregnancy and Postnatal period: Being Active Motivational Interviewing	Provides a how-to guide on motivational interviewing Available as short or long-form versions PA in clinical management of LTCs across lifespan
Bird W. Physical activity in the treatment of long term health conditions. BMJ, England. 2014. https://learning.bmj.com/learning/course-intro/physical-activity.html?courseId=10051913. [Accessed 10 Dec 2020]	Physical activity in the treatment of long term health conditions	Public Health England BMJ	2014	United Kingdom	Non Empirical	E-Learning	E-Learning programme for Healthcare to champion PA with patients with LT health conditions	GPs Trainee GPs Foundation Doctors Practice Nurses	GPs Trainee GPs Foundation Doctors Practice Nurses	CPD: E-Learning Module	The Importance of Physical Activity How does physical activity produce health benefits? Health Benefits of PA: Cancer Health Benefits of PA: Diabetes Health Benefits of PA: Osteoarthritus and LBP Health Benefits of Pa: CV Disease Health Benefits of PA: Respiratory Disease Health Benefits of PA: depression, Anxiety, sleep and Dementia	Principles of promoting PA in primary care Important safety considerations for recommending PA in these conditions
Motivate 2 Move. 2020. https://gpcpd.heiw.wales/clinical/motivate-2-move/. [Accessed 10 dec 2020]	Motivate2Move	BASEM RCGP Wales PH Wales	2020	United Kingdom	Non Empirical	E-Learning	Condition Specific PA resource for physiotherapists and other HCPs	Physiotherapists HCPs	Physiotherapists HCPs	CPD: Online Resources	Health benefits of PA. Assessment of current levels of PA (GPPAQ) All cause mortality Cancer CVD Chronic Kidney Disease Mental Health Metabolic syndrome and diabetes MSK Health Neurolical conditions inc. SCI Obesity Pregnancy Respiratory disease sedentary behaviour Surgery and exercise BCT - COM-B and MI FITT MECC Exercise Referral Contraindications to PA Primary care signposting	Factsheets and online resources provided by physiotherapists, for physiotherapists
Moving Medicine. Find the right consultation. Moving Medicine. https://movingmedicine.ac.uk/ [Accessed 01 Dec 2020].	Moving Medicine	Faculty of Sports and Exercise Medicine Public Health Englan Sport England	2018	United Kingdom	Non Empirical	Online Resource	Condition specific information to help give advice on PA at all stages of life cycle	HCPs	HCPs	CPD: Online Resources	Consultation guides for 1, 5, and + minute converstions with patients Amputee Cancer COPD Dementia Depression Falls and Frailty Inflammaory Disease Ischaemic Heart Disease MSK Pain Postnatal Pregnancy Primary Prevention Stroke T2 Diabetes Obesity Local support and actrivities signposting for conditions Why movement matters Patient stories - We Are Undefeatable	Collaboration with experts, professional bodies, and charities representing patients and HCPs I each disease area
Public Health Scotland. Encouraging and enabling physical activity. Public Health Scotland, Scotland. https://elearning.healthscotland.com/course/view.php?id=581. [Accessed 10 Dec 2020]	Encouraging and enabling physical activity	Public Health Scotland	2020	United Kingdom	Non Empirical	E-Learning	Encourage and enable people to be more active	HCPs Health and Social Care	HCPs Health and Social care	CPD: E-Learning Module	Understanding PA CMOguidelines Benefits of PA National PA Pathway Screening for PA Delivering advice Signposting and referal	NPAP Rasining the issue Screening for PA levels Person-centred intervention Signpost ands refferal Follow up and review
